# Supplementary material for: Investigation of the effect of O doping on the Li-ion mobility of Li3PS4 solid-state electrolytes: an ab initio molecular dynamics study
Source: Royal Society of Chemistry journal article supplement (doi:10.1039/d4nj03064h), 2024-01-01
Supplement: d4nj03064h5.pdf [file d4nj03064h5.pdf]

Supplementary Information

**Investigation of the effect of O doping on the Li-ion mobility of  $\text{Li}_3\text{PS}_4$  solid-state electrolytes: an *ab initio* molecular dynamics study**

Leijuan Ma,<sup>a\*</sup> Kai Yuan,<sup>a</sup> Jifang Zhang,<sup>a</sup> Chen Wu,<sup>b\*</sup> and Xiaoyang Zhao,<sup>c\*</sup>

<sup>a</sup> School of Automotive Engineering, Henan Polytechnic Institute, Nanyang 473000, P.R. China.

<sup>b</sup> Department of Physics, School of Science, Harbin University of Science and Technology, Harbin 150080, P.R. China.

<sup>c</sup> School of Geomatic and Environmental Engineering, Henan Polytechnic Institute, Nanyang 473000, P.R. China.

**Corresponding Author:** \* E-mail address: 2005027@hnpi.edu.cn (Leijuan Ma);  
wuchenwf@126.com (Chen Wu); zhaoxiaoyang@hnpi.edu.cn (Xiaoyang Zhao)

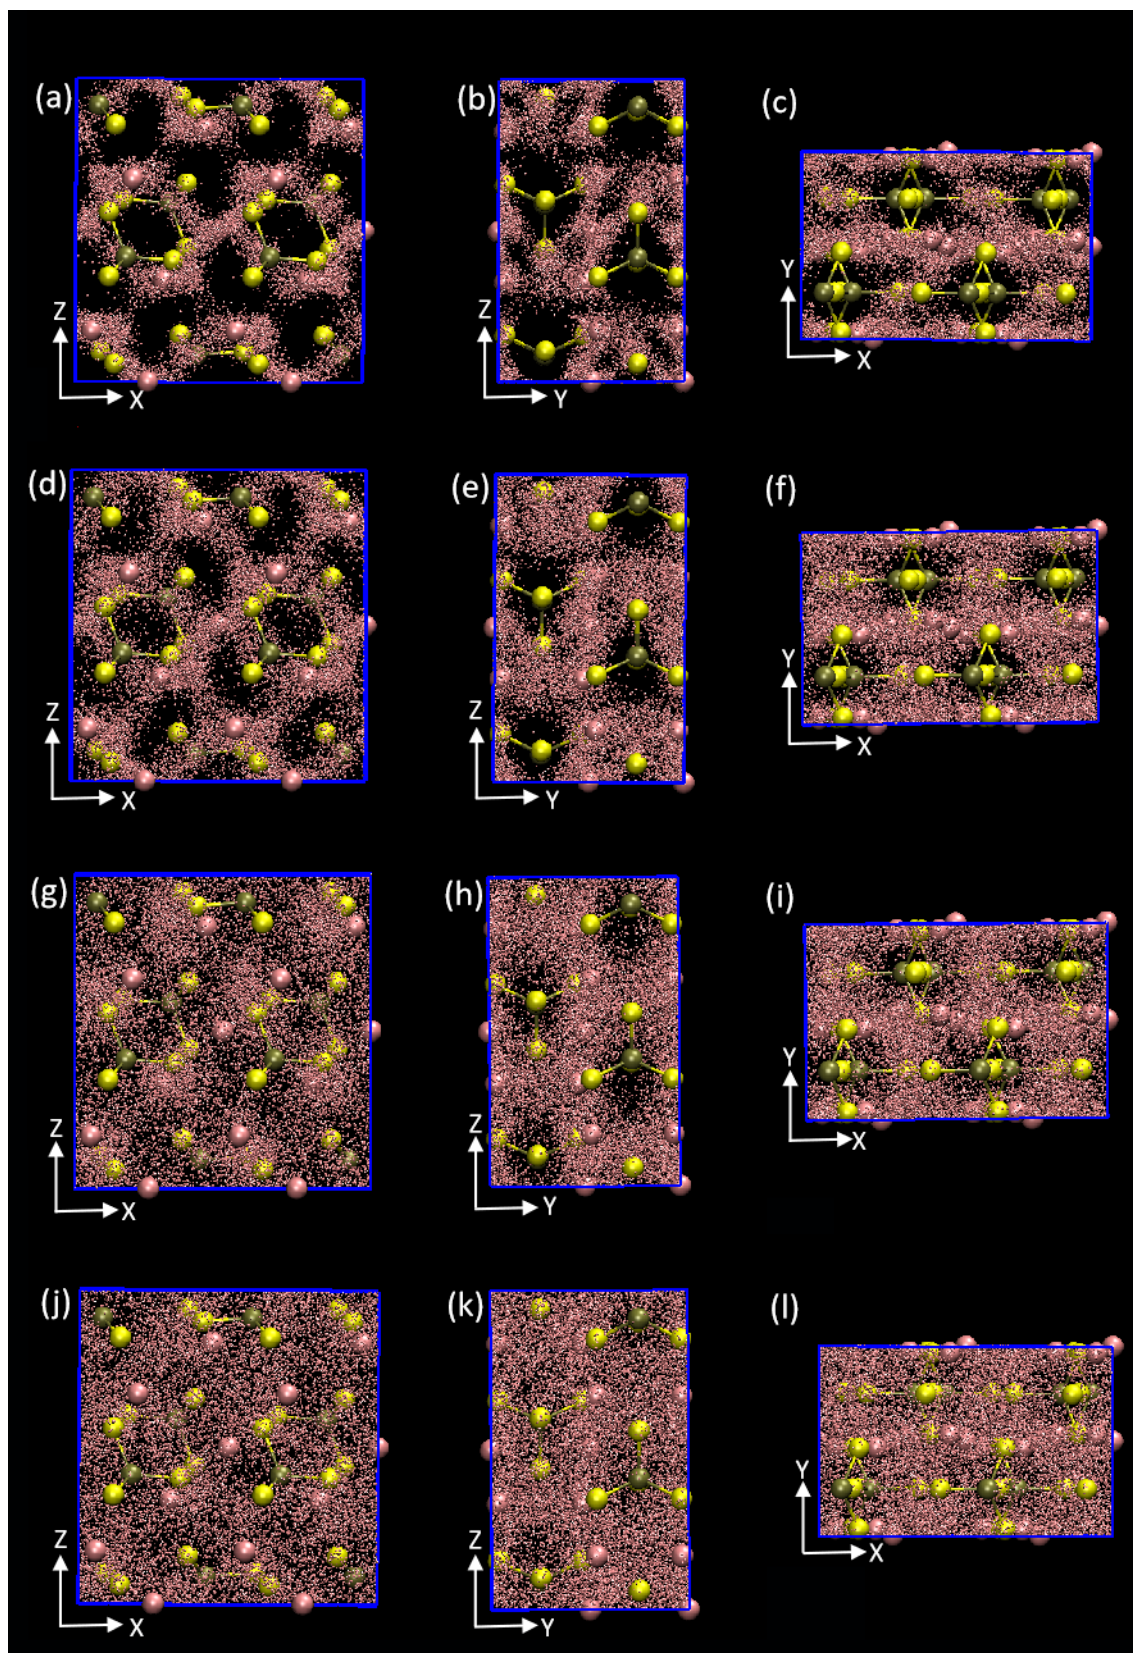

**Figure S1.** Trajectories (small pink balls) of Li ions (large pink balls) during AIMD simulations of  $\text{Li}_3\text{PS}_4$ . (a-c) 600 K, (d-f) 900 K, (g-i) 1200 K, and (j-l) 1500 K.

Colour set: brown, phosphorus; yellow, sulfur; pink, lithium; red, oxygen.

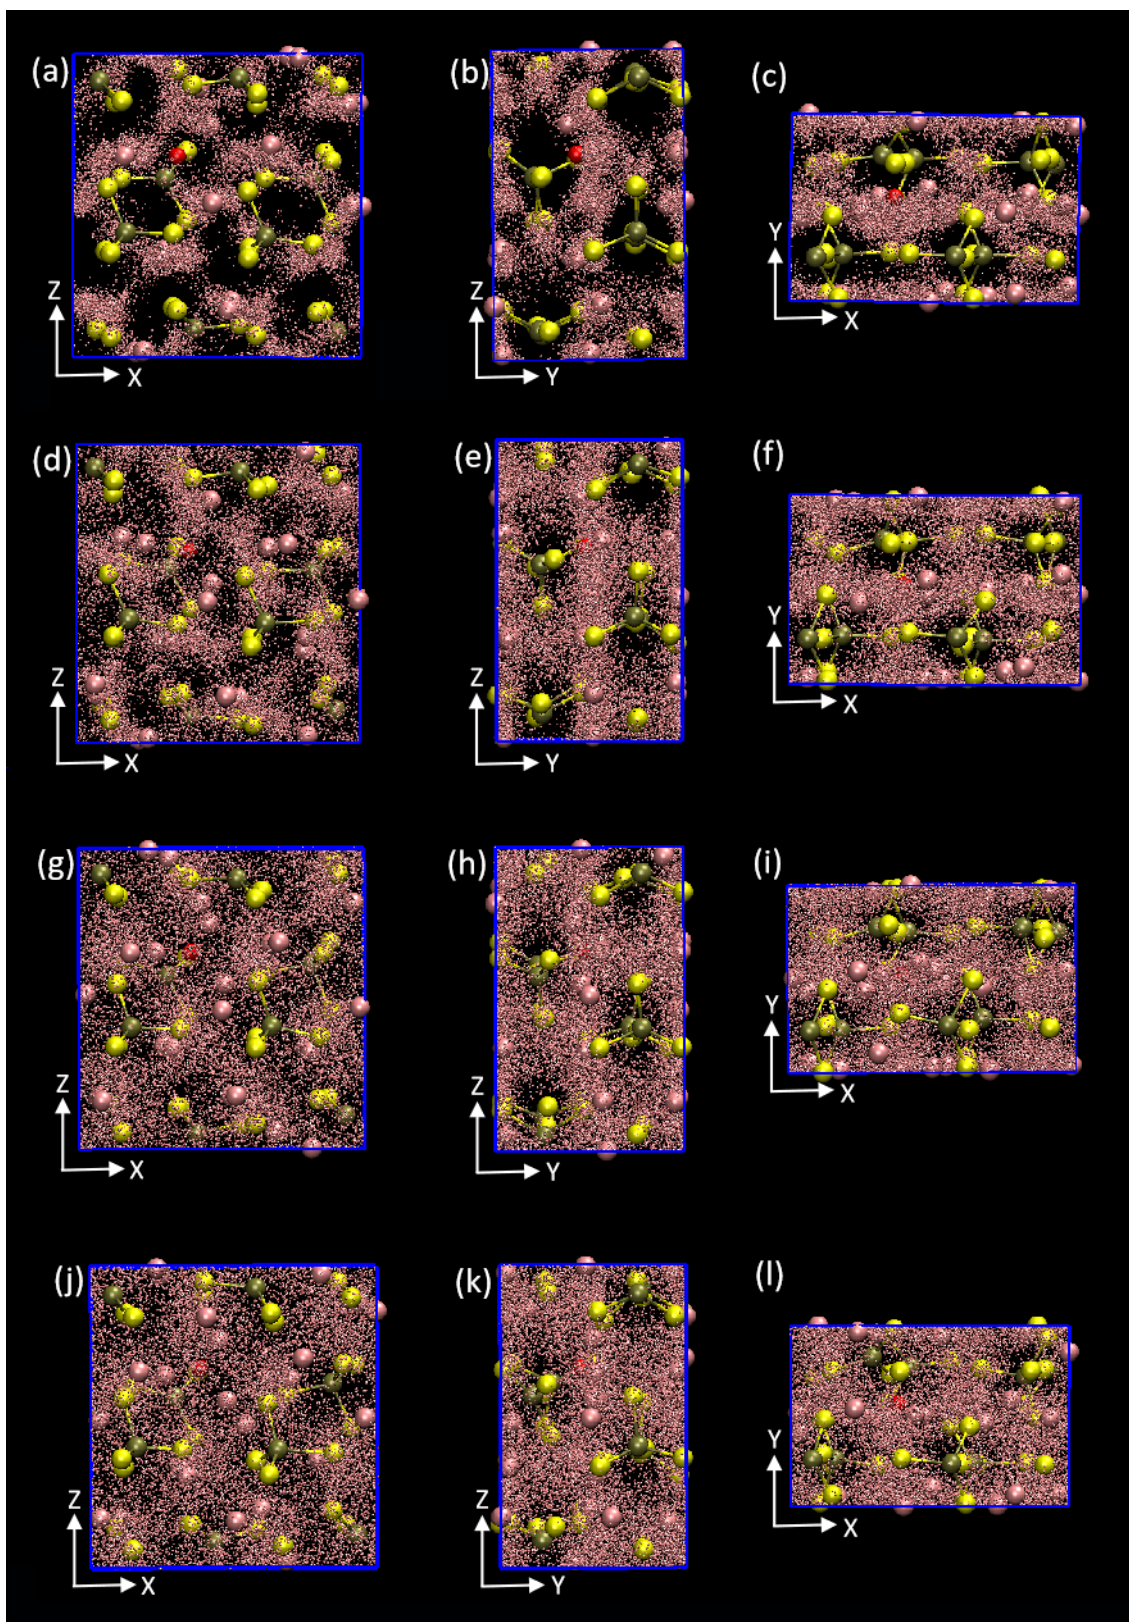

**Figure S2.** Trajectories (small pink balls) of Li ions (large pink balls) during AIMD simulations of O-doped  $\text{Li}_3\text{PS}_4$ . (a-c) 600 K, (d-f) 900 K, (g-i) 1200 K, and (j-l) 1500 K.

## 1 Procedure to obtain the diffusion coefficient using VASPKIT

VASPKIT → 722 (Mean Squared Displacement (MSD) Using FFT Method) → Li → 1000 (Skip the initial 1000 frames) → 1 (Every frame is used to calculate MSD) → MSD.dat

VASPKIT → 723 (Diffusion Coefficient and Ion Mobility from MSD.dat File) → 40000 (40,000 time steps were used to fit) → 1 (Ionic valency) → Diffusion coefficient

**Table S1** The data of diffusion coefficient ( $D$ ) of Li-ions of undoped  $\text{Li}_3\text{PS}_4$  (unit: $\text{cm}^2\cdot\text{S}^{-1}$ )

| Temperature        | 600 K      | 900 K      | 1200 K     | 1500 K     |
|--------------------|------------|------------|------------|------------|
| $D$ in x direction | 0.1599E-04 | 0.5526E-04 | 0.1402E-03 | 0.1746E-03 |
| $D$ in y direction | 0.6425E-05 | 0.3008E-04 | 0.8425E-04 | 0.2680E-03 |
| $D$ in z direction | 0.1110E-04 | 0.4778E-04 | 0.1023E-03 | 0.2186E-03 |
| Average $D$        | 0.1117E-04 | 0.4437E-04 | 0.1089E-03 | 0.2204E-03 |

**Table S2** The data of diffusion coefficient ( $D$ ) of Li-ions of O-doped  $\text{Li}_3\text{PS}_4$  (unit: $\text{cm}^2\cdot\text{S}^{-1}$ )

| Temperature        | 600 K      | 900 K      | 1200 K     | 1500 K     |
|--------------------|------------|------------|------------|------------|
| $D$ in x direction | 0.1559E-04 | 0.4359E-04 | 0.1129E-03 | 0.1528E-03 |
| $D$ in y direction | 0.1113E-04 | 0.5810E-04 | 0.1322E-03 | 0.1935E-03 |
| $D$ in z direction | 0.9798E-05 | 0.3191E-04 | 0.1164E-03 | 0.1265E-03 |
| Average $D$        | 0.1217E-04 | 0.4453E-04 | 0.1205E-03 | 0.1576E-03 |

## 2 The calculation process of ionic conductivity

Diffusion Coefficient  $D = D_0 \exp\left(-\frac{E_a}{k_B T}\right)$

Ionic Mobility  $\mu = \frac{Dq}{k_B T}$

Ionic Conductivity  $\sigma = \frac{NDq^2}{k_B T}$

Arrhenius' formula  $\log D = \log D_0 - \frac{E_a}{2303k_B} \left(\frac{1000}{T}\right)$

where  $D$  is the diffusion coefficient,  $\mu$  is the ionic mobility,  $\sigma$  is the ionic conductivity,  $D_0$  is the pre-exponential factor,  $E_a$  is migration barriers,  $T$  is the temperature,  $k_B$  is Boltzmann constant,  $q$  is the ionic charge and  $N$  is the number of mobile ions per unit volume.

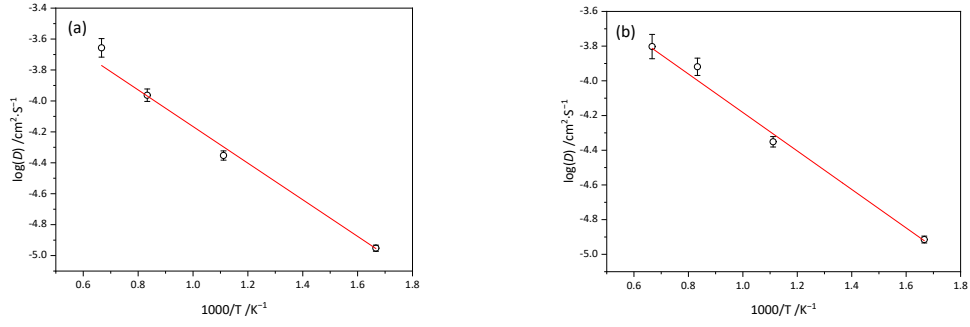

**Figure S3.** Arrhenius plots of  $\text{Li}_3\text{PS}_4$  (a) and O-doped  $\text{Li}_3\text{PS}_4$  (b).

(a)  $\text{Li}_3\text{PS}_4$

$$\log D = -1.1837 \times \left( \frac{1000}{T} \right) - 2.9819 \quad r^2 = 0.9914$$

$T = 300 \text{ K}$

$$D = 10^{(-1.1837 \times \left( \frac{1000}{300} \right) - 2.9819)} = 1.1815 \times 10^{-7} \text{ cm}^2 \cdot \text{S}^{-1}$$

$$\sigma = \frac{24 \times (1.1815 \times 10^{-7}) \times 1^2}{8.6173 \times 10^{-5} \times 300} = 1.10 \times 10^{-4} \text{ S} \cdot \text{cm}^{-1}$$

(b) O-doped  $\text{Li}_3\text{PS}_4$

$$\log D = -1.1090 \times \left( \frac{1000}{T} \right) - 3.0734 \quad r^2 = 0.9883$$

$T = 300 \text{ K}$

$$D = 10^{(-1.1090 \times \left( \frac{1000}{300} \right) - 3.0734)} = 1.6980 \times 10^{-7} \text{ cm}^2 \cdot \text{S}^{-1}$$

$$\sigma = \frac{24 \times (1.6980 \times 10^{-7}) \times 1^2}{8.6173 \times 10^{-5} \times 300} = 1.58 \times 10^{-4} \text{ S} \cdot \text{cm}^{-1}$$

**Table S3** The experimental data of ionic conductivity of O-doped  $\text{Li}_3\text{PS}_4$  (unit:  $\text{S} \cdot \text{cm}^{-1}$ )

| Composition                                                                      | Ionic conductivity    | Ref |
|----------------------------------------------------------------------------------|-----------------------|-----|
| $\beta\text{-Li}_3\text{PS}_4$                                                   | $1.60 \times 10^{-4}$ | 1   |
| $\text{Li}_{3.06}\text{P}_{0.98}\text{Zn}_{0.02}\text{S}_{3.98}\text{O}_{0.02}$  | $1.12 \times 10^{-3}$ | 2   |
| $75\text{Li}_2\text{S} \cdot 23\text{P}_2\text{S}_5 \cdot 2\text{P}_2\text{O}_5$ | $2.72 \times 10^{-4}$ | 3   |
| $90\text{-Li}_3\text{PS}_4 - 10\text{Li}_6\text{ZnNb}_4\text{O}_{14}$            | $2.44 \times 10^{-4}$ | 4   |
| $98\text{-Li}_3\text{PS}_4 - 2\text{Al}_2\text{O}_3$                             | $2.28 \times 10^{-4}$ | 4   |
| $98\text{-Li}_3\text{PS}_4 - 2\text{SiO}_2$                                      | $1.84 \times 10^{-4}$ | 4   |

## References

1. Z. Liu, W. Fu, E. A. Payzant, X. Yu, Z. Wu, N. J. Dudney, J. Kiggans, K. Hong, A. J. Rondinone and C. Liang, *J. Am. Chem. Soc.*, 2013, **135**, 975-978.
2. G. Liu, D. Xie, X. Wang, X. Yao, S. Chen, R. Xiao, H. Li and X. Xu, *Energy Stor. Mater.*, 2019, **17**, 266-274.
3. J. Li, W. Liu, X. Zhang, Y. Ma, Y. Wei, Z. Fu, J. Li and Y. Yan, *J. Solid State Electrochem.*, 2021, **25**, 1259-1269.
4. Z. D. Hood, H. Wang, Y. Li, A. S. Pandian, M. P. Paranthaman and C. Liang, *Solid State Ion*, 2015, **283**, 75-80.
